|                                                                                                                                                                   |    |
|-------------------------------------------------------------------------------------------------------------------------------------------------------------------|----|
|                                                                                                                                                                   | 1  |
|                                                                                                                                                                   | 2  |
| Oral diadochokinesis, tongue pressure, and lip-seal strength in Japanese workers: A cross-                                                                        | 3  |
| sectional study                                                                                                                                                   | 4  |
| Short title: Oral diadochokinesis, tongue pressure, and lip-seal strength in Japanese workers                                                                     | 5  |
|                                                                                                                                                                   | 6  |
| Akira Minoura <sup>1,*</sup> , Yoshiaki Ihara <sup>2</sup> , Hiroataka Kato <sup>2</sup> , Kouzou Murakami <sup>3</sup> , Yoshio Watanabe <sup>4</sup> , Kojiro 7 |    |
| Hirano <sup>5</sup> , Yoshinori Ito <sup>3</sup> , and Akatsuki Kokaze <sup>1</sup>                                                                               | 8  |
|                                                                                                                                                                   | 9  |
|                                                                                                                                                                   | 10 |
| <sup>1</sup> Department of Hygiene, Public Health, and Preventive Medicine, Showa University School of 11                                                         |    |
| Medicine, 1-5-8 Hatanodai, Shinagawa-ku, Tokyo 142-8555, Japan                                                                                                    | 12 |
| <sup>2</sup> Division of Oral Functional Rehabilitation Medicine, Department of Special Needs Dentistry, School 13                                                |    |
| of Dentistry, Showa University, 2-1-1 Kitasenzoku, Ohta-ku, Tokyo 145-8515, Japan                                                                                 | 14 |
| <sup>3</sup> Department of Radiology, Division of Radiation Oncology, Showa University School of Medicine, 1- 15                                                  |    |
| 5-8 Hatanodai, Shinagawa-ku, Tokyo 142-8555, Japan                                                                                                                | 16 |
| <sup>4</sup> Division of Respiratory Medicine and Allergology, Department of Medicine, Showa University School 17                                                 |    |
| of Medicine, 1-5-8 Hatanodai, Shinagawa-ku, Tokyo 142-8555, Japan                                                                                                 | 18 |
| <sup>5</sup> Department of Otorhinolaryngology Head and Neck Surgery, Showa University School of Medicine, 19                                                     |    |
| 1-5-8 Hatanodai, Shinagawa-ku, Tokyo 142-8555, Japan                                                                                                              | 20 |
|                                                                                                                                                                   | 21 |
|                                                                                                                                                                   | 22 |
| *Correspondence author:                                                                                                                                           | 23 |
| E-mail: <a href="mailto:minoaki@med.showa-u.ac.jp">minoaki@med.showa-u.ac.jp</a> (AM)                                                                             | 24 |
| <b>NOTE: This preprint reports new research that has not been certified by peer review and should not be used to guide clinical practice.</b>                     | 25 |

## Abstract

26

This cross-sectional study investigated the correlation between lip-seal strength, tongue pressure, and oral diadochokinesis (OD) in Japanese workers. The relationships between lip-seal strength, tongue pressure, and OD by age groups were investigated using multiple regression analyses on 496 workers. OD was measured using the number of consecutive “Pa,” “Ta,” and “Ka” vocalizations that could be produced in 5 s. In this study, 478 participants (437 males and 41 females) were included in the analysis after excluding 18 participants who could not complete all oral cavity measurements. This study revealed a significant positive correlation between “Pa,” “Ta,” and “Ka,” with correlation coefficients of 0.500–0.665. Lip-seal strength only significantly correlated positively with “Pa”; however, tongue pressure significantly correlated positively with all of “Pa,” “Ta,” and “Ka” vocalizations. Regarding body mass index (BMI), no significant relationship with either “Pa,” “Ta,” or “Ka” was observed. As a result of aging, “Ta” and “Ka” showed a significant negative correlation with age. Multiple regression analyses, which included age, sex, BMI, alcohol consumption, and smoking, revealed a strong association between “Pa,” “Ta,” and “Ka” and lip-seal strength. However, only “Pa” showed a significant correlation with tongue pressure. Even in young and middle-aged adults, OD may be associated with lip-seal strength and tongue pressure. Measuring OD through dental screening of workers will help prevent the disease across a wide age range.

27

42

43

## Introduction

44

Oral diadochokinesis (OD) is a test that evaluates the mobility of the oral organs, including the tongue, lips, and jaw, particularly among the elderly [1, 2]. It uses repetitive vocalizations of vowels and consonants to measure the accuracy, speed, and consistency of oral movements [3]. Dentists or speech-language pathologists primarily perform OD to evaluate movement disorders caused by dysarthria, delayed speech development, and neurological disorders [4]. In contrast, in several

45

neurological disorders, tongue pressure and lip-seal strength may be sensitive indicators of articulatory 50 function and oral motor impairment [5]. Although tongue pressure, lip-seal strength, and OD may be 51 associated with diseases in the elderly, how these factors relate to OD in younger and middle-aged 52 individuals remains unclear[1, 4]. We have shown the trend of tongue pressure and lip-seal strength by 53 age group among Japanese workers [5]. In particular, lip-seal strength decreased in young individuals 54 compared with that in older adults, and tongue pressure decreased in young individuals compared with 55 that in middle-aged adults [5]. Measuring tongue pressure and lip-seal strength requires a special 56 instrument; however, OD does not require special equipment and is easy to measure; therefore, 57 investigating the relationship between tongue pressure, lip-seal strength, and OD can lead to a simple 58 measurement of the oral environment or prevent oral disorders[4, 6]. Enhancing working conditions 59 may prevent daytime sleepiness due to obstructive sleep apnea, according to previous research [7, 8]. 60

Building on these findings, this study suggests that improving OD increases tongue pressure and 61 lip-seal strength, ultimately reducing daytime sleepiness among workers. Increasing OD could help 62 reduce sleep-related accidents among workers, particularly the elderly, at a cheap cost because the 63 Japanese government is encouraging the employment of the elderly, whose percentage is rapidly rising 64 in the country [7]. Because obstructive sleep apnea is believed to be intensified by age-related tongue 65 root depression, OD improvement may help avoid daytime sleepiness [10]. Particularly in jobs requiring 66 life-threatening duties, including security guards and drivers, measuring OD is crucial to help forecast 67 excessive daytime sleepiness. Therefore, based on earlier studies, we postulated that OD, tongue 68 pressure, and lip-seal strength are related and may vary with age. 69

Consequentially, this study aimed to examine the correlation among tongue pressure, lip-seal 70 strength, and OD across various age groups, with the aim of averting such disorders. We investigated 71 the correlation between tongue pressure, lip-seal strength, and OD in Japanese workers, categorized by 72 age group. 73

## Materials and Methods 74

## **Study design** 75

This study, which was conducted between November 2021 and June 2022, involved 496 76 employees (454 males and 42 females) from two Japanese taxi companies (the recruitment period: from 77 November 9 2021 to June 22 2022). After excluding 18 participants who could not complete all oral 78 cavity measurements, the analysis included 478 participants (437 males and 41 females). Before the 79 study began, the Medical Ethics Committee of Showa University School of Medicine (21-088-A) 80 approved the survey and collected written informed consent from each participant. 81

## **Measurements** 82

An experienced dentist instructed the study participants in the OD task measurement and recorded 83 the results. We instructed the participants to repeat a given syllable, “Pa,” “Ta,” and “Ka,” as fast as 84 possible on one breath in 5 s [4]. Furthermore, we trained a dentist in the measurement of tongue 85 pressure and lip-seal strength among all participants. We used a reliable specialized device (Lipple Kun, 86 Shofu, Kyoto, Japan) to measure the lip-seal strength [11, 12-14]. We measured tongue pressure using 87 specialized equipment (TPM-01; JMS Co. Ltd., Hiroshima, Japan). We determined the participants’ 88 tongue pressure by averaging the three recordings. We took each measurement after a minimum of 1 89 min of rest following the previous measurement [8]. 90

## **Covariates** 91

We used a self-administered questionnaire with items on age, alcohol use (once a week or more, 92 less than once a week), smoking habits (yes, no), weight (kg), and height (cm) because studies have 93 associated alcohol use, smoking, and overweight/obesity with tongue pressure and lip-seal strength 94 among healthy Japanese individuals [15]. The COVID-19 pandemic in Japan has led to changes in job 95 descriptions, such as from drivers to clerks, which we did not include in the questionnaire. 96

## **Statistical analysis** 97

We used the Shapiro–Wilk test for continuous factors to verify a normal contribution. This study 98  
displays median values, specifically the 25th and 75th percentiles, for continuous variables with non- 99  
normal distribution. We computed correlation coefficients (Pearson’s  $r$ ) before performing the analysis 100  
to verify multicollinearity between tongue pressure, OD, lip-seal strength, and other variables.  $P$ -values 101  
< 0.05 were used to denote statistical significance. In the primary statistical analysis, we investigated 102  
the age-group-specific relationships between tongue pressure, lip-seal strength, and OD using multiple 103  
regression analysis. We have presented the data along with 95% confidence intervals. This study 104  
adhered to the Strengthening the Reporting of Observational Studies in Epidemiology standard for 105  
conducting cross-sectional studies. Statistical analyses were performed using JMP (version 17.0; SAS 106  
Institute, Inc., Cary, NC, USA). 107

## Results 108

In this study, to examine the characteristics of OD by age, we stratified the 478 subjects into those in 109  
their 20s, 30s, 40s, 50s, and >60s. This study excluded participants under the age of 20 years. Table 1 110  
shows the attributes of the subjects categorized by age group. 111

**Table 1. Characteristics of the study subjects by age group**

|                          | <b>Total</b>      | <b>20s</b>        | <b>30s</b>         | <b>40s</b>         | <b>50s</b>         | <b>60s and over</b> | <sup>1)</sup> <i>p</i> -value |
|--------------------------|-------------------|-------------------|--------------------|--------------------|--------------------|---------------------|-------------------------------|
|                          | (N = 478)         | (n = 111)         | (n = 65)           | (n = 90)           | (n = 151)          | (n = 61)            |                               |
| <b>Lip-seal strength</b> | 13.5 (11.4, 16.2) | 11.6 (9.5, 13.7)  | 12.9 (11.4, 15.7)* | 14.6 (12.3, 17.1)* | 14.3 (12.2, 16.9)* | 14.9 (11.8, 17.9)*  | <0.001                        |
| <b>Tongue pressure</b>   | 41.7 (35.5, 48.4) | 39.8 (33.3, 46.1) | 44.4 (37.7, 50.0)* | 44.3 (35.3, 50.1)* | 42.0 (36.7, 47.2)  | 41.0 (34.6, 46.4)   | 0.012                         |
| <b>Age</b>               | 47.0 (31.0, 55.0) |                   |                    |                    |                    |                     |                               |
| <b>Female</b>            | 41 (8.6)          | 26 (23.4)         | 2 (3.1)            | 3 (3.3)            | 8 (5.3)            | 2 (3.3)             | <0.001                        |
| <b>BMI</b>               | 24.1 (21.3, 27.1) | 21.7 (19.7, 24.5) | 24.1 (22.3, 28.2)* | 24.6 (22.3, 27.5)* | 24.5 (22.2, 27.4)* | 25.4 (23.1, 28.7)*  | <0.001                        |
| <b>Pa</b>                | 33 (31, 35)       | 33 (32, 35)       | 33 (30, 36)        | 34 (32, 36)        | 33 (31, 34)        | 32 (29, 33)*        | <0.001                        |
| <b>Ta</b>                | 35 (32, 38)       | 36 (33, 39)       | 35 (33, 40)        | 36 (33, 39)        | 34 (32, 37) *      | 32 (30, 34)*        | <0.001                        |
| <b>Ka</b>                | 32 (29, 34)       | 33 (30, 35)       | 32 (30, 36)        | 33 (29, 36)        | 31 (29, 33)        | 29 (26, 32)*        | <0.001                        |
| <b>Alcohol use</b>       | 275 (57.5)        | 55 (49.6)         | 35 (53.9)          | 59 (65.6)          | 84 (55.6)          | 42 (68.9)           | 0.06                          |

|                |            |           |           |           |           |           |       |
|----------------|------------|-----------|-----------|-----------|-----------|-----------|-------|
| <b>Smoking</b> | 169 (37.2) | 29 (26.1) | 23 (35.4) | 44 (48.9) | 53 (35.1) | 20 (32.8) | 0.021 |
|----------------|------------|-----------|-----------|-----------|-----------|-----------|-------|

Except where indicated n (%), values are median (25th, 75th percentile). BMI: Body mass index. <sup>1)</sup>Analysis of variance was performed for continuous variables, 113  
and Chi-square test was performed for dichotomous variables. \* The results of the Dunnett's test by age, using the 20s as controls, were significantly lower or 114  
higher. 115

116

Table 2 shows the correlation coefficients between OD and covariates, excluding workers aged  $\geq 60$  years. The results indicate a significant positive correlation between “Pa,” “Ta,” and “Ka,” with correlation coefficients of 0.500–0.665. Tongue pressure had a noteworthy positive correlation with “Pa,” “Ta,” and “Ka,” although lip-seal strength only displayed a significant positive correlation with “Pa.” No significant relationship was observed between BMI and “Pa,” “Ta,” and “Ka.” Furthermore, “Ta” and “Ka” showed a significant negative correlation with age. Upon evaluation, we determined that none of the factors strongly correlated with any of the other covariates. To prevent multicollinearity, we decided to incorporate all factors into the analysis



**Table 2. Correlation coefficients between oral diadochokibesis and covariates (excluded 60s and over)**

|                             |          |          |          | <b>Pearson's r</b> |          |          |          |
|-----------------------------|----------|----------|----------|--------------------|----------|----------|----------|
|                             | <b>a</b> | <b>b</b> | <b>c</b> | <b>d</b>           | <b>e</b> | <b>f</b> | <b>g</b> |
| <b>a. Pa</b>                |          | 0.606 *  | 0.500 *  | 0.121 *            | 0.184 *  | -0.016   | -0.021   |
| <b>b. Ta</b>                |          |          | 0.665 *  | 0.207              | 0.202 *  | -0.098 * | 0.020    |
| <b>c. Ka</b>                |          |          |          | 0.446              | 0.144 *  | -0.101 * | -0.037   |
| <b>d. Lip-seal strength</b> |          |          |          |                    | 0.401 *  | 0.321 *  | 0.307 *  |
| <b>e. Tongue pressure</b>   |          |          |          |                    |          | 0.119 *  | 0.292 *  |
| <b>f. Age</b>               |          |          |          |                    |          |          | 0.210 *  |
| <b>g. BMI</b>               |          |          |          |                    |          |          |          |

Values are correlation coefficient. BMI: Body mass index. \*p < 0.05.

Table 3 presents a concise overview of the relationship between lip-seal strength, tongue pressure, and OD across different age groups. We conducted several regression models to separately investigate the effects of lip-seal strength and tongue pressure on OD. Model 1 found a significant correlation between “Pa,” “Ta,” and “Ka” and tongue pressure. Model 2 found a significant correlation between “Pa” and lip-seal strength. We adjusted both models for sex, age, BMI, alcohol consumption, and smoking.

128

133

**Table 3. Associations between tongue pressure, lip-seal strength, and oral diadochokibesis (Results of multiple regression analyses)**

|                          | <b>Pa</b>                |                        | <b>Ta</b>                 | <b>Ka</b>              |
|--------------------------|--------------------------|------------------------|---------------------------|------------------------|
|                          | Model 1                  | Model 2                | Model 1                   | Model 1                |
| <b>Tongue pressure</b>   | 0.070 (0.036, 0.105) *   |                        | 0.101 (0.056, 0.146) *    | 0.076 (0.031, 0.120) * |
| <b>Lip-seal strength</b> |                          | 0.140 (0.040, 0.239) * |                           |                        |
| <b>Age</b>               | 0.010 (-0.038, 0.017)    | -0.018 (-0.047, 0.010) | -0.047 (-0.082, -0.011) * | -0,035 (-0.070, 0.001) |
| <b>Female</b>            | 0.609 (0.036, 1.181)     | 0.612 (0.030, 1.193) * | -0.021 (-0.771, 0.729)    | -0.214 (-0.944, 0.516) |
| <b>BMI</b>               | -0.065 (-0.144, 0.014) * | -0.049 (-0.128, 0.030) | -0.021 (-0.123, 0.081)    | -0.062 (-0.163, 0.038) |
| <b>Alcohol use</b>       | 0.129 (-0.195, 0.453)    | 0.155 (-0.172, 0.482)  | -0.013 (-0.433, 0.407)    | 0.097 (-0.317, 0.510)  |
| <b>Smoking</b>           | 0.120 (-0.217, 0.456)    | 0.135 (-0.206, 0.475)  | 0.059 (-0.378, 0.497)     | 0.235 (-0.194, 0.664)  |

Values are standardized beta (95% confidence interval). BMI: Body mass index. Model 1: Association between oral diadochokibesis and tongue pressure 135 adjusted for age, gender, BMI, alcohol use and smoking. Model 2: Association between oral diadochokibesis and lip-seal strength adjusted for age, gender, 136 BMI, alcohol use and smoking. \*p < 0.05.

## Discussion

138

This appears to be the first investigation into the correlation between OD in Japanese individuals and specific lip-seal strength and tongue pressure. After adjusting for age, sex, BMI, alcohol consumption, and smoking, the results showed a positive correlation between tongue pressure and “Pa,” “Ta,” and “Ka.” Moreover, lip-seal strength showed a positive correlation with “Pa.” Regardless of age, these results showed that good OD can help maintain lip-seal strength and tongue pressure, which may help prevent oral disorders due to deterioration with age [4, 8]. According to the results of this study, OD has mostly been used to evaluate frailty and oral diseases in older individuals, at least in Japanese studies before this one [1]. However, it may also be used to determine health-related outcomes in younger groups [1, 9, 10]. Moreover, recent studies have shown that daytime sleepiness is a serious risk factor for insulin resistance [11]. Regardless of age or weight, daytime sleepiness may contribute to the development of insulin resistance [12]. OD may also contribute to the association between daytime sleepiness and diabetes mellitus and risk factors for obesity and aging. Future research should examine causal relationships among eating patterns, daytime sleepiness, diabetes mellitus, and oral environment markers, including lip-seal strength and tongue pressure. Training perioral muscle function may improve percutaneous oxygen saturation during sleep, despite reports linking it to sleep disturbances and diabetes mellitus [20]. Interventions can help modify eating and OD behaviors, which could prevent diabetes mellitus and daytime sleepiness apnea [13, 14]. At least for workers, sleep problems can lead to serious health problems associated with excessive daytime sleepiness, including hypertension and cerebral vascular disease [15]. Considering Japan’s aging population and falling birth rate, protecting the labor force is imperative by preventing or treating sleep disorders early. The outcomes of this study may contribute to the development of novel approaches to support OD-based sleep disorder prevention or early intervention. In Japan, some reports have suggested a link between tongue pressure and obstructive sleep apnea [16]. We chose to identify and evaluate the OD of workers from oral health examinations because the absence of subjective symptoms raised the possibility that many patients with sleep disorders may go unnoticed. Several restrictions were applied to this study. First, we were unable

139

140

141

142

143

144

145

146

147

148

149

150

151

152

153

154

155

156

157

158

159

160

161

162

163

to examine causal relationships between tongue pressure, lip-seal strength, and OD because this study 164  
was based on a cross-sectional survey. Second, there were far fewer females than males in this study; 165  
therefore, it was impossible to examine sex differences. Although some research has indicated sex 166  
variations in lip-seal strength, the next poll should examine sex disparities in oral health, including OD 167  
[17, 18]. Third, in this study, evaluating how the COVID-19 epidemic affected the participants' dental 168  
health-related lifestyle habits was impossible. Changes in the lifestyle (particularly in terms of BMI and 169  
eating habits) of workers caused by COVID-19 preventative initiatives may have impacted the 170  
measurement of OD [19, 20]. Future longitudinal studies will be necessary to accurately assess the 171  
pandemic's impact [21]. 172

## Conclusions 173

We found that tongue pressure and lip-seal strength may be associated with OD even in young 174  
and middle-aged adults. We believe that measuring OD through dental screening of workers will lead 175  
to disease prevention across a wide age range, despite the need to carefully assess the pandemic's 176  
impact. 177

## Acknowledgments 178

We express our deepest gratitude to Okuchy Co., Ltd. and all those who participated in the 179  
measurements during the COVID-19 pandemic. 180

## References 182

1. Konishi M. Can oral diadochokinesis be used as an assessment tool of oral function in older adults requiring 183  
care in nursing home? *J Oral Rehabil.* 2023. Epub 2023/09/22. doi: 10.1111/joor.13594. PubMed PMID: 37737483. 184
2. Ong YQ, Lee J, Chu SY, Chai SC, Gan KB, Ibrahim NM, et al. Oral-diadochokinesis between Parkinson's 185  
disease and neurotypical elderly among Malaysian-Malay speakers. *International journal of language &* 186  
*communication disorders.* 2024. Epub 2024/03/07. doi: 10.1111/1460-6984.13025. PubMed PMID: 38451114. 187
3. Skodda S, Schlegel U. Speech rate and rhythm in Parkinson's disease. *Movement disorders : official journal* 188  
*of the Movement Disorder Society.* 2008;23(7):985-92. Epub 2008/04/03. doi: 10.1002/mds.21996. PubMed PMID: 189  
18383114. 190

4. Sakai K, Nakayama E, Tohara H, Kodama K, Takehisa T, Takehisa Y, et al. Relationship between tongue strength, lip strength, and nutrition-related sarcopenia in older rehabilitation inpatients: a cross-sectional study. *Clinical interventions in aging*. 2017;12:1207-14. Epub 2017/08/18. doi: 10.2147/cia.S141148. PubMed PMID: 28814847; PubMed Central PMCID: PMC5546916. 191-194
5. Minoura A, Ihara Y, Kato H, Murakami K, Watanabe Y, Hirano K, et al. Lip Seal Strength and Tongue Pressure among Japanese Male Workers: Comparison of Different Age Groups. *International Journal of Environmental Research and Public Health*. 2023;20(4):2862. PubMed PMID: doi:10.3390/ijerph20042862. 195-197
6. Kugimiya Y, Oki T, Ohta M, Ryu M, Kobayashi K, Sakurai K, et al. Distribution of lip-seal strength and its relation to oral motor functions. *Clinical and experimental dental research*. 2021;7(6):1122-30. Epub 2021/05/09. doi: 10.1002/cre2.440. PubMed PMID: 33963687; PubMed Central PMCID: PMC5546916. 198-200
7. Ministry of Health LaWJ. Abridged life table. 2021. 201
8. Ihara Y, Kato H, Tashimo Y, Iizumi Y, Fukunishi Y, Sato H, et al. Changes in oral function, swallowing function, and quality of life in patients with head and neck cancer: a prospective cohort study. *BMC oral health*. 2022;22(1):293. Epub 2022/07/18. doi: 10.1186/s12903-022-02329-5. PubMed PMID: 35843950; PubMed Central PMCID: PMC9288711. 202-205
9. Sakayori T, Maki Y, Hirata S, Okada M, Ishii T. Evaluation of a Japanese "Prevention of long-term care" project for the improvement in oral function in the high-risk elderly. *Geriatr Gerontol Int*. 2013;13(2):451-7. Epub 2012/09/12. doi: 10.1111/j.1447-0594.2012.00930.x. PubMed PMID: 22963330. 206-208
10. Minakuchi S, Tsuga K, Ikebe K, Ueda T, Tamura F, Nagao K, et al. Oral hypofunction in the older population: Position paper of the Japanese Society of Gerodontology in 2016. *Gerodontology*. 2018;35(4):317-24. Epub 2018/06/09. doi: 10.1111/ger.12347. PubMed PMID: 29882364. 209-211
11. Punjabi NM, Shahar E, Redline S, Gottlieb DJ, Givelber R, Resnick HE. Sleep-disordered breathing, glucose intolerance, and insulin resistance: the Sleep Heart Health Study. *American journal of epidemiology*. 2004;160(6):521-30. Epub 2004/09/09. doi: 10.1093/aje/kwh261. PubMed PMID: 15353412. 212-214
12. Pamidi S, Wroblewski K, Broussard J, Day A, Hanlon EC, Abraham V, et al. Obstructive sleep apnea in young lean men: impact on insulin sensitivity and secretion. *Diabetes care*. 2012;35(11):2384-9. Epub 2012/08/23. doi: 10.2337/dc12-0841. PubMed PMID: 22912423; PubMed Central PMCID: PMC3476882. 215-217
13. Shimosaka M, Fujii W, Kakinoki Y, Akifusa S. Prolongation of Oral Phase for Initial Swallow of Solid Food is Associated with Oral Diadochokinesis Deterioration in Nursing Home Residents in Japan: A Cross-Sectional Study. *JAR life*. 2020;9:3-8. Epub 2020/04/20. doi: 10.14283/jarlife.2020.3. PubMed PMID: 36922917; PubMed Central PMCID: PMC10002879. 218-221
14. Minoura A, Ihara Y, Kato H, Murakami K, Watanabe Y, Hirano K, et al. Relationships between Lip Seal Strength, Tongue Pressure, and Daytime Sleepiness in Japanese Workers: A Cross-Sectional Study. *Clinics and practice*. 2023;13(4):753-62. Epub 2023/07/25. doi: 10.3390/clinpract13040068. PubMed PMID: 37489417; PubMed Central PMCID: PMC10366721. 222-225
15. Mendes FA, Marone SAM, Duarte BB, Arenas ACP. Epidemiologic Profile of Patients with Snoring and Obstructive Sleep Apnea in a University Hospital. *Int Arch Otorhinolaryngol*. 2014;18(02):142-5. Epub 28.02.2014. 226-227
16. Kanazaki M, Ogawa T, Izumi T. Tongue Protrusion Strength in Arousal State Is Predictive of the Airway Patency in Obstructive Sleep Apnea. *The Tohoku journal of experimental medicine*. 2015;236(4):241-5. doi: 10.1620/tjem.236.241. 228-230

17. Murakami M, Adachi T, Nakatsuka K, Kato T, Oishi M, Masuda Y. Gender differences in maximum voluntary lip-closing force during lip pursing in healthy young adults. *J Oral Rehabil.* 2012;39(6):399-404. Epub 2011/11/26. doi: 10.1111/j.1365-2842.2011.02268.x. PubMed PMID: 22115393. 231  
232  
233
18. Miyamoto T, Yamada K, Hijiya K, Kageyama T, Kato T, Sugo H, et al. Ability to control directional lip-closing force during voluntary lip pursing in healthy young adults. *J Oral Rehabil.* 2019;46(6):526-32. Epub 2019/02/15. doi: 10.1111/joor.12776. PubMed PMID: 30761567. 234  
235  
236
19. Duran S, Erkin Ö. Psychologic distress and sleep quality among adults in Turkey during the COVID-19 pandemic. *Progress in neuro-psychopharmacology & biological psychiatry.* 2021;107:110254. Epub 2021/01/25. doi: 10.1016/j.pnpbp.2021.110254. PubMed PMID: 33485962; PubMed Central PMCID: PMCPMC7825837. 237  
238  
239
20. Matsuyama Y, Aida J, Takeuchi K, Koyama S, Tabuchi T. Dental Pain and Worsened Socioeconomic Conditions Due to the COVID-19 Pandemic. *Journal of dental research.* 2021;100(6):591-8. Epub 2021/04/02. doi: 10.1177/00220345211005782. PubMed PMID: 33792422; PubMed Central PMCID: PMCPMC8138328. 240  
241  
242
21. AlShareef SM. Occupational Outcomes Associated with Sleep Quality and Excessive Daytime Sleepiness: Results from a National Survey. *Nature and science of sleep.* 2020;12:875-82. Epub 2020/11/07. doi: 10.2147/nss.S271154. PubMed PMID: 33154691; PubMed Central PMCID: PMCPMC7608607. 243  
244  
245  
246  
247  
248
